# Supplementary material for: Molecular Dynamics Simulation of the Interfacial Shear Properties between Thermoplastic Polyurethane and Functionalized Graphene Sheet
Source: MDPI journal article supplement (doi:10.3390/polym14225032), 2022-11-20
Supplement: s1 [file s1]

# Supplementary Materials

**Table S1:** The interaction energy of TPU with FGS and its each part

| Model   | $\Delta E_{tot}$ (kCal/mole) | $\Delta E_{fg}$ (kCal/mole) | $\Delta E_{pg}$ (kCal/mole)* |
|---------|------------------------------|-----------------------------|------------------------------|
| OH25    | -1597.8091                   | -136.3177                   | -1461.4914                   |
| OH50    | -1651.3662                   | -266.8211                   | -1384.5451                   |
| OH75    | -1779.0537                   | -412.7077                   | -1366.3461                   |
| OH100   | -1781.5958                   | -461.1655                   | -1320.4303                   |
| O25     | -1503.1035                   | -53.8817                    | -1449.2218                   |
| O50     | -1487.6606                   | -103.4461                   | -1384.2145                   |
| O75     | -1526.8296                   | -153.7790                   | -1373.0506                   |
| O100    | -1484.8994                   | -193.7762                   | -1291.1233                   |
| NH25    | -1456.6676                   | -40.4411                    | -1416.2265                   |
| NH50    | -1447.4916                   | -84.3402                    | -1363.1514                   |
| NH75    | -1451.2858                   | -133.9499                   | -1317.3360                   |
| NH100   | -1443.9901                   | -150.5562                   | -1293.4340                   |
| COOH25  | -1644.7305                   | -264.4425                   | -1380.2880                   |
| COOH50  | -1776.6160                   | -502.8351                   | -1273.7809                   |
| COOH75  | -1867.3655                   | -688.6883                   | -1178.6772                   |
| COOH100 | -1955.3862                   | -851.8146                   | -1103.5716                   |

\*  $\Delta E_{tot}$  denotes the total interaction energy,  $\Delta E_{fg}$  denotes the interaction energy between TPU and functional groups,  $\Delta E_{pg}$  denotes the interaction energy between TPU and pure graphene

**Table S2:** Nonbond Interaction Parameters

| <i>i</i> | $\sigma_i$ (Å) | $\varepsilon_i$ (kcal/mol) |
|----------|----------------|----------------------------|
| C2       | 4.010          | 0.054                      |
| Hc       | 2.995          | 0.020                      |
| O 2      | 3.420          | 0.240                      |
| C 2      | 3.810          | 0.120                      |
| N 2      | 3.600          | 0.106                      |
| Cp       | 4.010          | 0.064                      |
| Hn2      | 1.650          | 0.013                      |
| O 1      | 3.300          | 0.013                      |
| Oc       | 3.535          | 0.240                      |
| C3       | 4.010          | 0.054                      |
| Ho2      | 1.110          | 0.013                      |
| C 1      | 3.810          | 0.120                      |
| Ho       | 1.098          | 0.013                      |
| Hn       | 1.098          | 0.013                      |
| Nb       | 4.070          | 0.065                      |
| O3e      | 3.535          | 0.240                      |
| Oh       | 3.535          | 0.240                      |

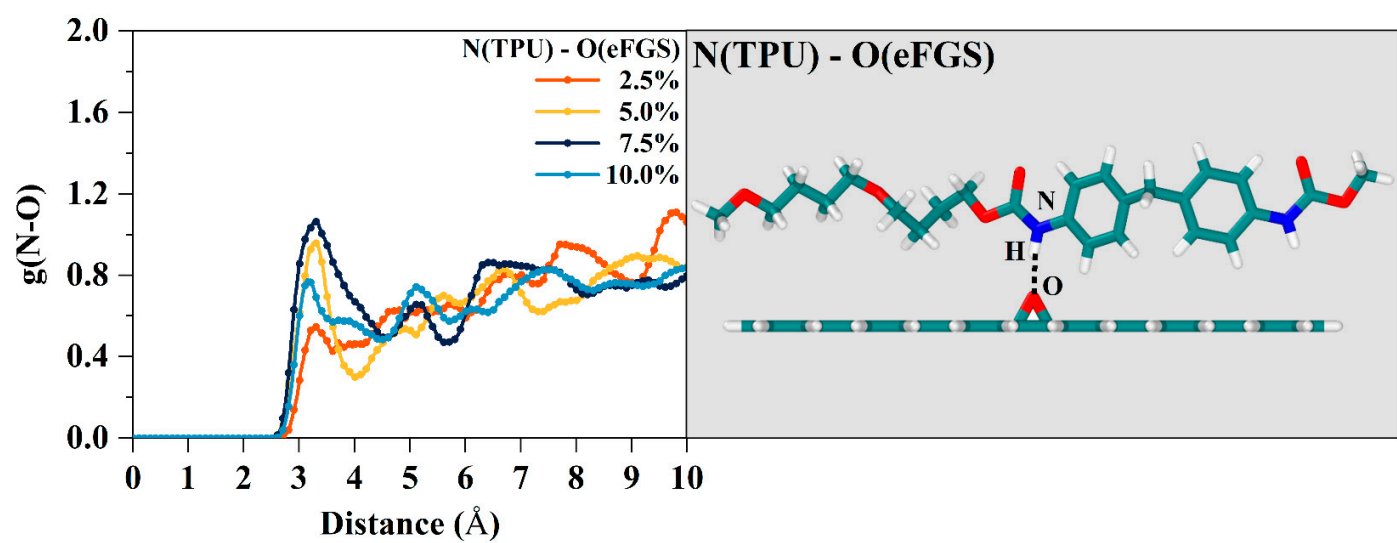

**Figure S1:** RDF plot of N atom of  $\text{-NH}$  group in TPU and O atom of  $\text{-O-}$  group in eFGS

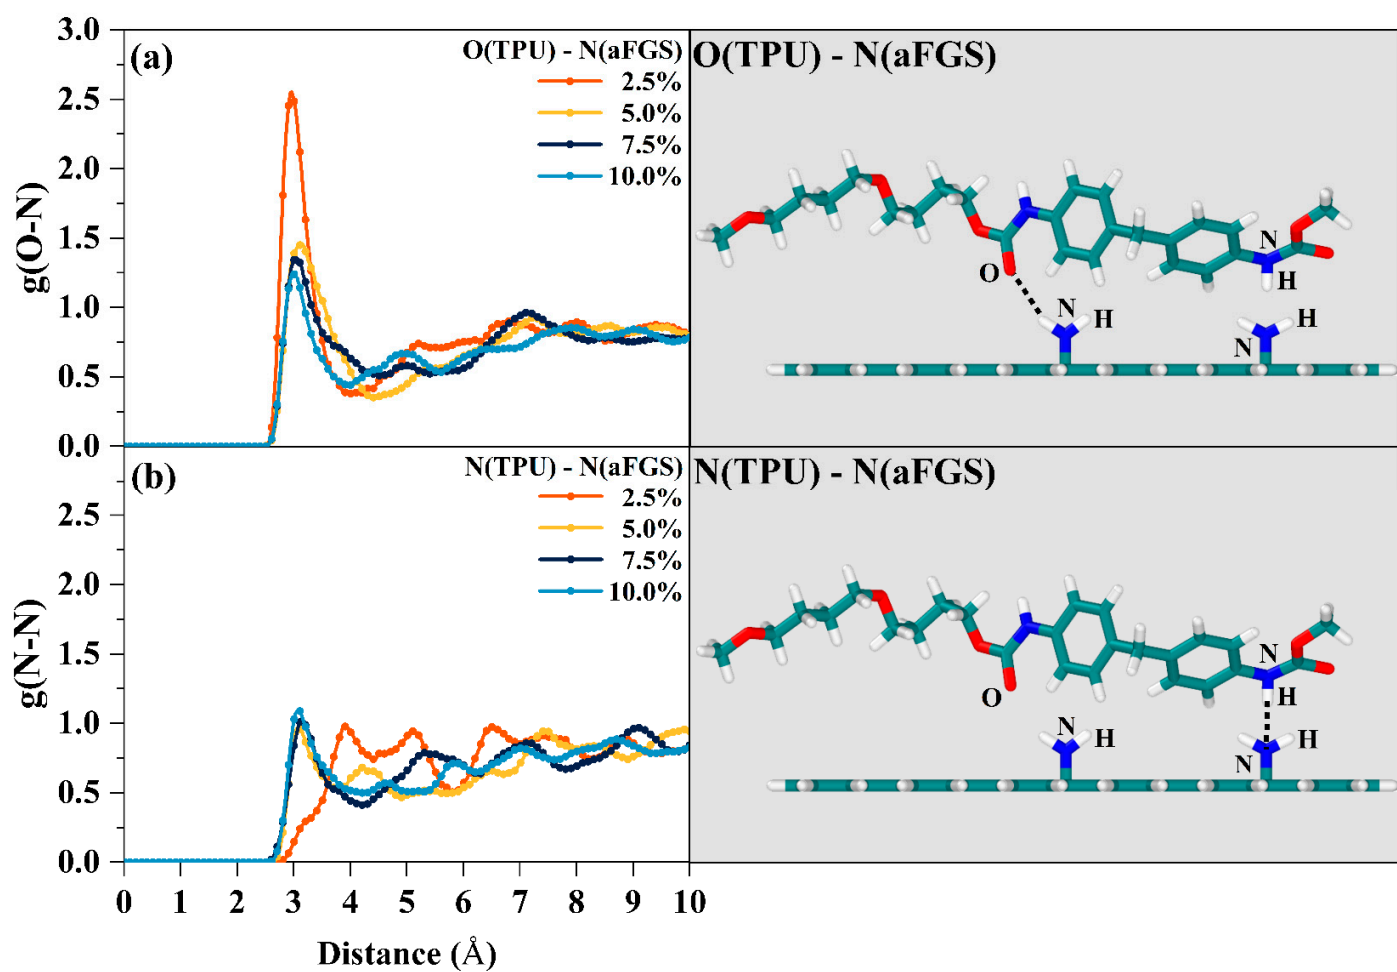

**Figure S2:** RDF plot of (a) O atom of C=O group in TPU and N atom of NH<sub>2</sub> group in aFGS (b) N atom of -NH group in TPU and N atom of NH<sub>2</sub> group in aFGS

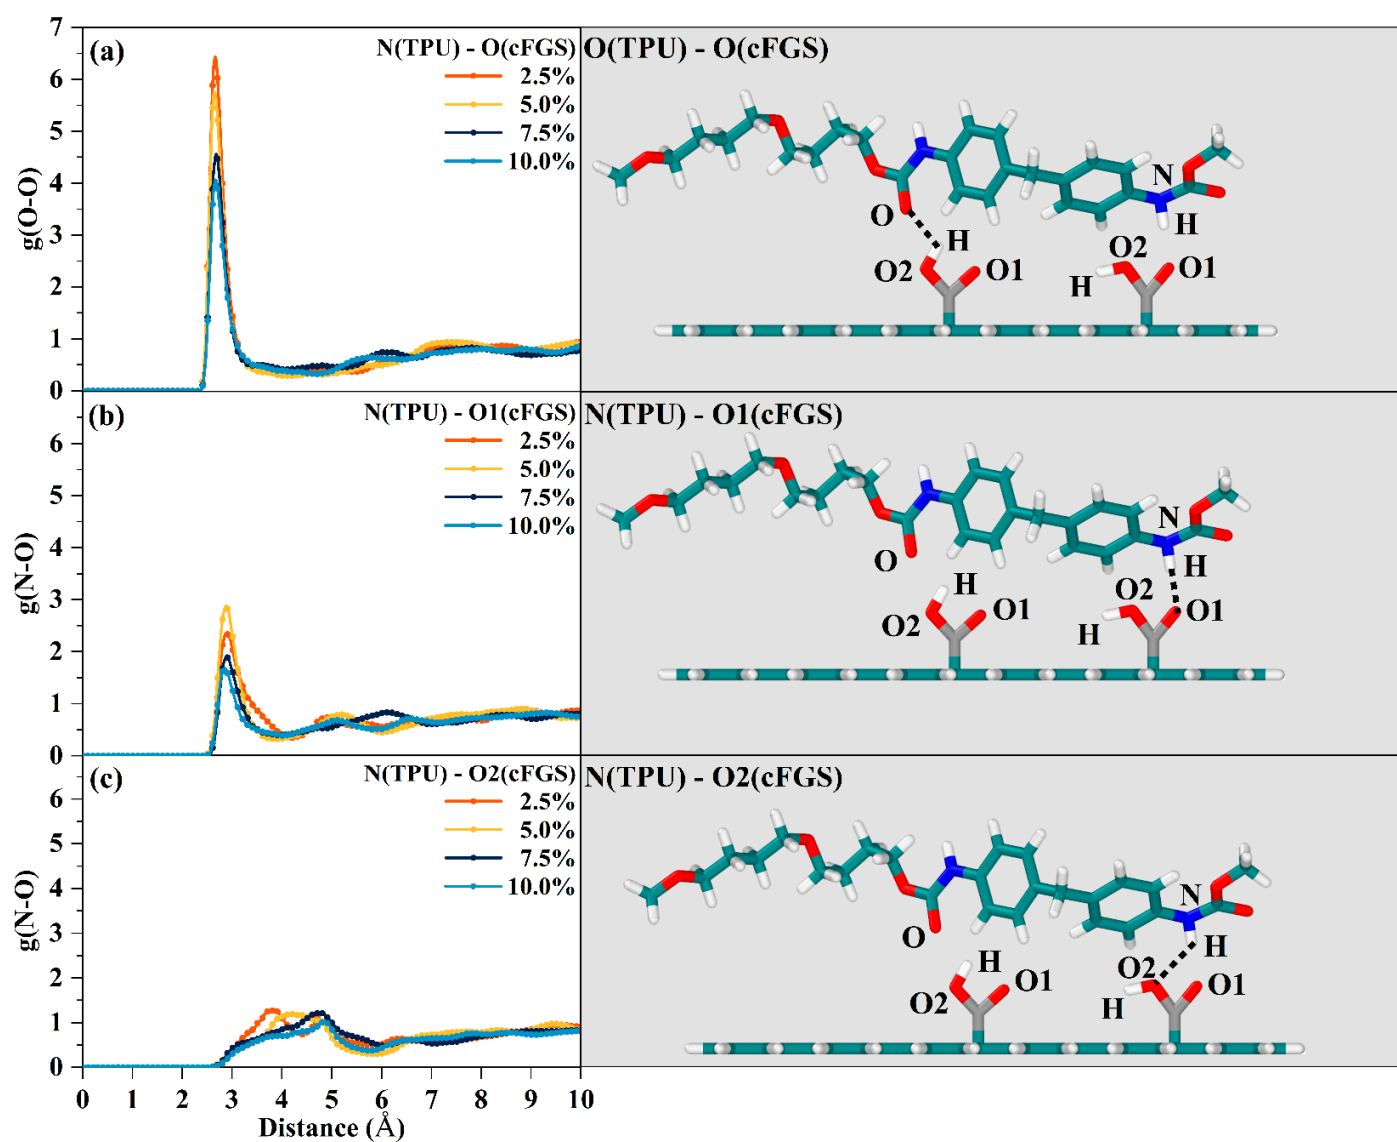

**Figure S3:** RDF plot of (a) O atom of C=O group in TPU and O atom of OH group in cFGS (b) N atom of -NH group in TPU and O atom of C=O group in cFGS (c) N atom of -NH group in TPU and O atom of OH group in cFGS
